# Supplementary material for: High-performance thermoelectric bracelet based on carbon nanotube ink printed directly onto a flexible cable
Source: Royal Society of Chemistry journal article supplement (doi:10.1039/c8ta08170k), 2018-01-01
Supplement: c8ta08170k1.pdf [file c8ta08170k1.pdf]

## Supplementary material

### **High-performance thermoelectric bracelet based on carbon nanotube ink printed directly onto flexible cable**

Kyung Tae Park<sup>a,b</sup>, Jaeyoo Choi<sup>a</sup>, Bora Lee<sup>c</sup>, Youngpyo Ko<sup>a</sup>, Kiyoun Jo<sup>a</sup>,  
Young Mo Lee<sup>a</sup>, Jung Ah Lim<sup>c</sup>, Chong Rae Park<sup>b</sup>, and Heesuk Kim<sup>a,d\*</sup>

<sup>a</sup>Photo-Electronic Hybrids Research Center, Korea Institute of Science and Technology (KIST), Seoul 02792, Republic of Korea.

\*E-mail: [heesukkim@kist.re.kr](mailto:heesukkim@kist.re.kr)

<sup>b</sup>Carbon Nanomaterials Design Laboratory, Research Institute of Advanced Materials, Department of Materials Science and Engineering, Seoul National University, Seoul 08826, Republic of Korea.

<sup>c</sup>Center for Opto-Electronic Materials and Devices, Korea Institute of Science and Technology (KIST), Seoul 02792, Republic of Korea.

<sup>d</sup>Division of Energy & Environment Technology, KIST School, Korea University of Science and Technology, Seoul 02792, Republic of Korea.

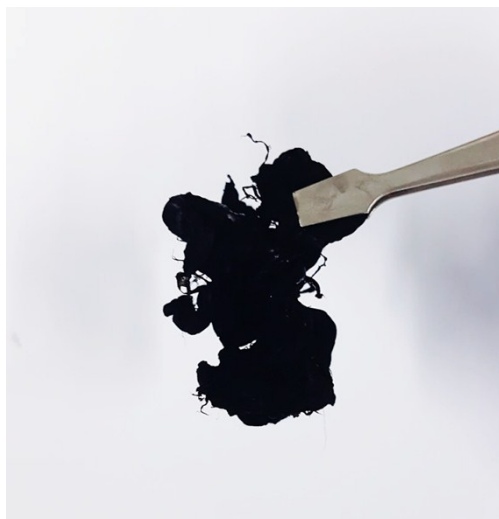

**Fig. S1.** Photograph of SWCNTs with hairy-like appearance used in this study.

**Table S1.** Thermoelectric properties of the pristine SWCNT used in this study

|       | Electrical conductivity<br>( $\text{Scm}^{-1}$ ) | Seebeck coefficient<br>( $\mu\text{VK}^{-1}$ ) | Power factor<br>( $\mu\text{Wm}^{-1}\text{K}^{-2}$ ) |
|-------|--------------------------------------------------|------------------------------------------------|------------------------------------------------------|
| SWCNT | 674                                              | 39.0                                           | 103                                                  |

**Table S2.** Viscosity of the solvents tested in this work

| Solvents                     | Viscosity (cP) |
|------------------------------|----------------|
| 1,2 Dichlorobenzene (DCB)    | 1.32           |
| N-Methyl-2-pyrrolidone (NMP) | 1.67           |
| Ethylene glycol (EG)         | 16.1           |
| Diethylene glycol (DEG)      | 30.2           |

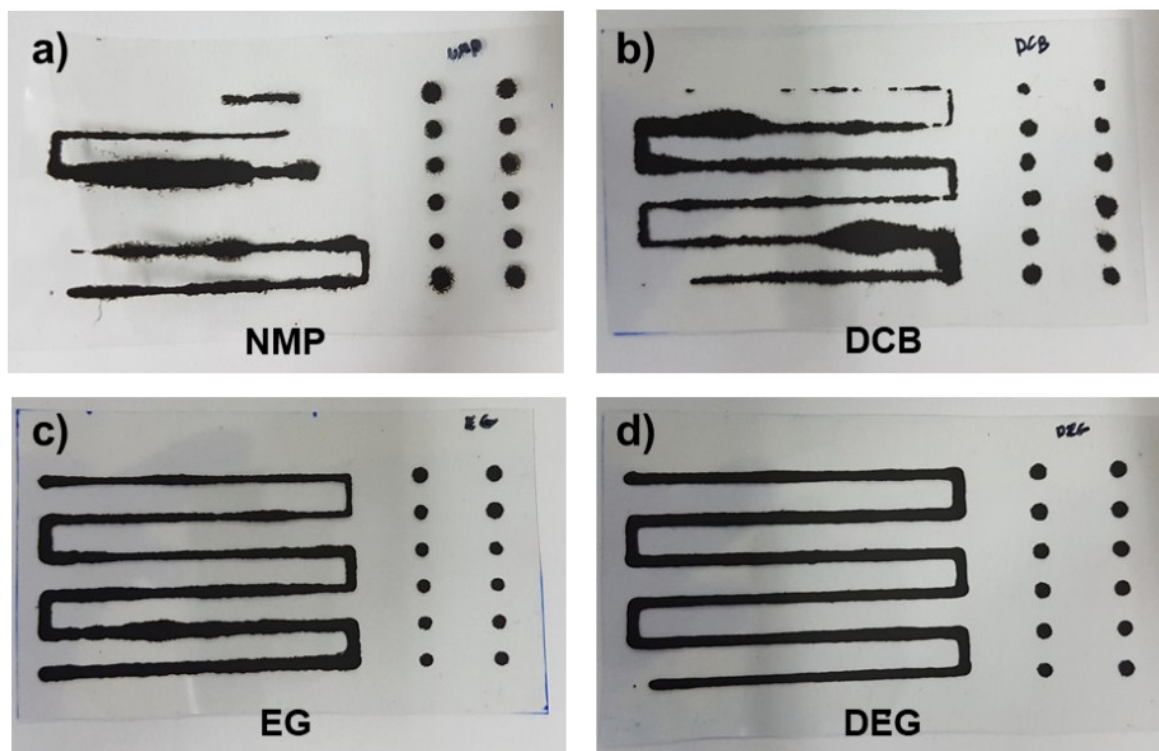

**Fig. S2.** Photographs showing the line and dot printing of CNT inks prepared in various solvents using ball milling ((a) NMP, (b) DCB, (c) EG and (d) DEG).

**Table S3.** Possible polymers to dope CNT into *n*- or *p*-type

| polymer                          | molecular<br>weight (K) | dopant<br>type | solubility in<br>DEG |
|----------------------------------|-------------------------|----------------|----------------------|
| Poly(vinylidene fluoride) (PVDF) | 534                     | P              | X                    |
| Polystyrene (PS)                 | 280                     | P              | X                    |
| Poly(vinyl alcohol) (PVA)        | 85                      | P              | X                    |
| Poly(methyl methacrylate) (PMMA) | 15                      | P              | X                    |
| Poly(vinyl acetate)              | 100                     | P              | X                    |
| Poly(acrylic acid) (PAA)         | 1.8                     | P              | O                    |
| Poly(vinyl pyrrolidone) (PVP)    | 10                      | N              | O                    |
| Poly(ethylenimine) (PEI)         | 0.8                     | N              | O                    |

a)

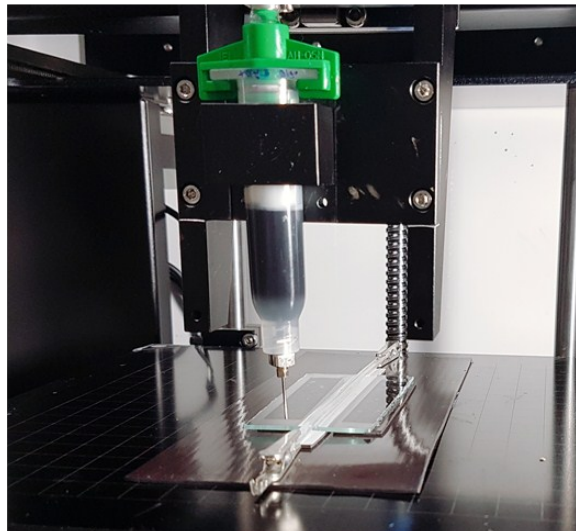

b)

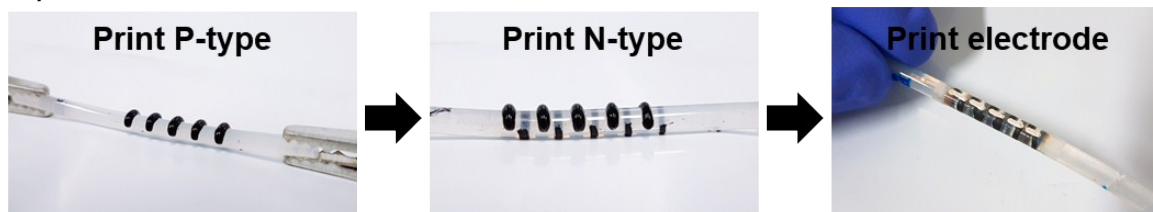

**Fig. S3.** Photograph showing (a) the automated printing setup and (b) the fabrication of bracelet-type TEG.

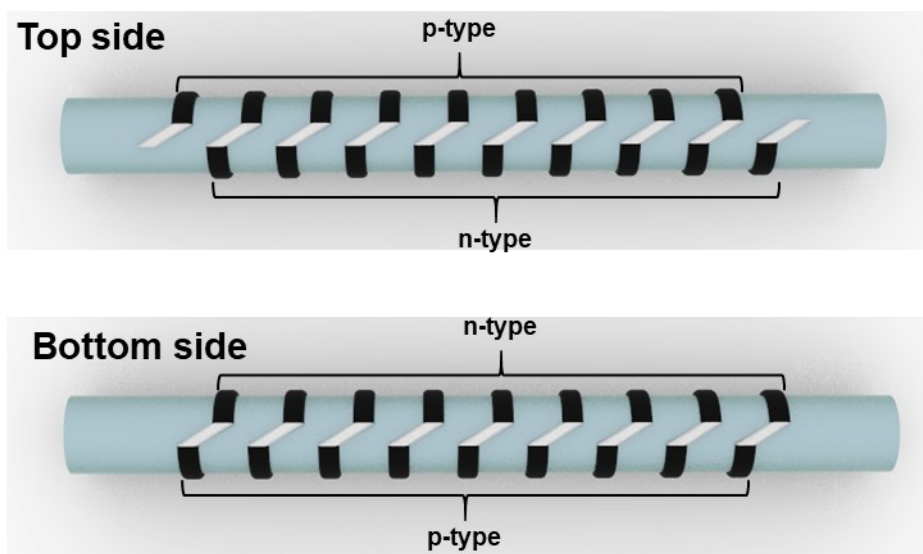

**Fig. S4.** Illustration showing details of how to connect  $p$ - and  $n$ -type legs in series.
